# Supplementary material
Source: publisher figshare collection journal article supplement (https://sage.figshare.com/ndownloader/files/14004026)
Supplement: Supplementary file 1 [file 14004026]

## Annex – List of Interviews with Media Practitioners in Chronological Order (N = 46)

|    | Interviewee Title                                                                  | Type of Medium                                                                                                                            | Countries Discussed   | Date     | Place            |
|----|------------------------------------------------------------------------------------|-------------------------------------------------------------------------------------------------------------------------------------------|-----------------------|----------|------------------|
| 1  | Director at Radio 100,7                                                            | Public Service Radio Station                                                                                                              | Luxembourg            | 2.9.16   | Luxembourg City  |
| 2  | Editor-in-Chief at RTL Television Luxembourg                                       | Main TV channel; commercial with public service mission                                                                                   | Luxembourg            | 5.9.16   | Luxembourg City  |
| 3  | General Secretary of the Press Council; retired journalist at <i>Tageblatt</i>     | Press Organisation; left-leaning daily newspaper, owned by the socialist trade union & affiliated with the Social Democratic party (LSAP) | Luxembourg            | 6.9.16   | Luxembourg City  |
| 4  | Editor-in-Chief at RTL Radio Luxembourg                                            | Main Radio station; commercial with public service mission                                                                                | Luxembourg            | 8.9.16   | Luxembourg City  |
| 5  | CEO at Saint Paul Luxembourg S.A.                                                  | Largest publishing house in Luxembourg                                                                                                    | Luxembourg            | 9.9.16   | Luxembourg City  |
| 6  | Founding Member & Editor at WOXX                                                   | Weekly independent newspaper; previously affiliated with the Green Party                                                                  | Luxembourg            | 12.9.16  | Luxembourg City  |
| 7  | Director and Editor-in-Chief at <i>Lëtzebuerger Journal</i>                        | Daily newspaper, affiliated with the Liberal Party                                                                                        | Luxembourg            | 20.9.16  | Luxembourg City  |
| 8  | Manager and Editor-in-Chief at <i>Lëtzebuerger Land</i>                            | Weekly independent newspaper                                                                                                              | Luxembourg            | 20.9.16  | Luxembourg City  |
| 9  | Deputy Editor-in-Chief at <i>Tageblatt</i>                                         | Daily newspaper, owned by the Socialist trade union & affiliated with the Social Democratic party                                         | Luxembourg            | 20.9.16  | Esch-sur-Alzette |
| 10 | Editor-in-Chief at <i>Luxemburger Wort</i>                                         | Daily newspaper, owned by the Roman Catholic Archdiocese & affiliated with the Christian democratic party                                 | Luxembourg            | 20.9.16  | Luxembourg City  |
| 11 | Political Journalist at <i>Luxemburger Wort</i>                                    | Daily newspaper, owned by the Roman Catholic Archdiocese & affiliated with the Christian Democratic party                                 | Luxembourg            | 22.9.16  | Luxembourg City  |
| 12 | Editor-in-Chief at Radio 100,7                                                     | Public Service Radio Station                                                                                                              | Luxembourg            | 27.9.16  | Luxembourg City  |
| 13 | Deputy Editor-in-Chief at Radio 100,7                                              | Public Service Radio Station                                                                                                              | Luxembourg            | 27.9.16  | Luxembourg City  |
| 14 | Director of ALIA ( <i>Autorité luxembourgeoise indépendante de l'audiovisuel</i> ) | Organisation that regulates audio-visual media located Luxembourg (including RTL stations)                                                | Luxembourg & Wallonia | 28.9.16  | Luxembourg City  |
| 15 | CEO & Founder at <i>Paperjam</i>                                                   | Monthly magazine, published in French and English by <i>Maison Moderne</i> , an independent publishing house                              | Luxembourg            | 24.10.16 | Luxembourg City  |

|    |                                                                                           |                                                                                                        |                     |          |                      |
|----|-------------------------------------------------------------------------------------------|--------------------------------------------------------------------------------------------------------|---------------------|----------|----------------------|
| 16 | Director of the Media and Communication Department of the Ministry of State of Luxembourg | N/A                                                                                                    | Luxembourg          | 18.11.16 | Luxembourg City      |
| 17 | Editor-in-Chief of <i>Volkskrant</i>                                                      | Centre-left daily newspaper, published by <i>Persgroep</i> , formerly linked to the Catholic pillar    | Netherlands         | 21.3.17  | Amsterdam            |
| 18 | Editor-in-Chief of <i>Trouw</i>                                                           | Centre-right daily newspaper, published by <i>Persgroep</i> , formerly linked to the Protestant pillar | Netherlands         | 22.3.17  | Amsterdam            |
| 19 | Editor-in-Chief of NOS                                                                    | One of the organisations that make up the Dutch public broadcasting service (NPO)                      | Netherlands         | 23.3.17  | Hilversum            |
| 20 | Editor-in-Chief of <i>Telegraaf</i>                                                       | Daily tabloid newspaper, published by <i>Mediahuis</i>                                                 | Netherlands         | 23.3.17  | Amsterdam            |
| 21 | Editor-in-Chief of <i>Algemeen Dagblad</i>                                                | Daily tabloid newspaper, published by <i>Persgroep</i>                                                 | Flanders            | 24.3.17  | Rotterdam            |
| 22 | Journalist at <i>Apache</i>                                                               | Membership based, investigative journalism platform                                                    | Flanders & Wallonia | 27.3.17  | Antwerp              |
| 23 | Editor-in-Chief of <i>Gazet van Antwerpen</i>                                             | Flemish local tabloid newspaper, published by <i>Mediahuis</i>                                         | Flanders            | 27.3.17  | Antwerp              |
| 24 | Director of News and Sports, RTBF                                                         | Francophone public service broadcaster                                                                 | Wallonia            | 29.3.17  | Brussels             |
| 25 | Political Journalist, VRT                                                                 | Flemish public service broadcaster                                                                     | Flanders            | 29.3.17  | Brussels             |
| 26 | Editor-in-Chief (opinionated), <i>De Morgen</i>                                           | Left-leaning daily newspaper, published by <i>Persgroep</i> , formerly linked to the Socialist pillar  | Flanders            | 30.3.17  | Kobbelegem (Asse)    |
| 27 | Editor-in-Chief for TV, VRT                                                               | Flemish public service broadcaster                                                                     | Flanders            | 31.3.17  | Brussels             |
| 28 | Editor-in-Chief, <i>Het Nieuwsblad</i>                                                    | Daily tabloid, published by <i>Mediahuis</i>                                                           | Flanders            | 4.4.17   | Antwerp              |
| 29 | Editor-in-Chief (opinionated), <i>De Standaard</i>                                        | Daily newspaper, published by <i>Mediahuis</i> , formerly linked to the Christian Democrats            | Flanders            | 5.4.17   | Groot-Bijgaarden     |
| 30 | Editor-in-Chief, <i>La Libre</i>                                                          | Centre-right daily newspaper, published by IPN, formerly linked to the Christian Democrats             | Wallonia            | 6.4.17   | Brussels             |
| 31 | General Editor-in-Chief, VTM                                                              | Main commercial television station in Flanders                                                         | Flanders            | 6.4.17   | Vilvoorde            |
| 32 | Representative of CSA ( <i>Conseil Supérieur de l'Audiovisuel</i> )                       | Organisation that regulates audio-visual media in francophone Belgium                                  | Wallonia            | 7.4.17   | Brussels             |
| 33 | Director of Programmes, RTL                                                               | Main commercial television station in francophone Belgium                                              | Wallonia            | 7.4.17   | Brussels (via phone) |
| 34 | Deputy Editor-in-Chief, <i>Le Soir</i>                                                    | Daily newspaper, published by <i>Rossel</i>                                                            | Wallonia            | 7.4.17   | Brussels             |

|    |                                                             |                                                                                                     |                                  |         |                        |
|----|-------------------------------------------------------------|-----------------------------------------------------------------------------------------------------|----------------------------------|---------|------------------------|
| 35 | General Director, BNNVARA                                   | One of the organisations that make up the Dutch public broadcasting service                         | Netherlands                      | 10.4.17 | Brussels (via phone)   |
| 36 | Political journalist, RTL                                   | Main commercial television station in francophone Belgium                                           | Wallonia                         | 12.4.17 | Brussels               |
| 37 | Editor-in-Chief, <i>Het Laatste Nieuws</i>                  | Daily tabloid, published by <i>Persgroep</i> , formerly linked to the Catholic pillar               | Flanders                         | 19.4.17 | Luxembourg (via Skype) |
| 38 | Editor-in-Chief, <i>Elsevier Weekblad</i>                   | Independent weekly magazine                                                                         | Netherlands                      | 9.8.17  | Cambridge (via phone)  |
| 39 | Dutch TV & freelance newspaper journalist; UK correspondent | N/A                                                                                                 | Netherlands                      | 12.8.17 | London                 |
| 40 | Former Lobbyist                                             | N/A                                                                                                 | Netherlands                      | 14.8.17 | Amsterdam              |
| 41 | Former Editor-in-Chief of <i>Volkskrant</i>                 | Centre-left daily newspaper, published by <i>Persgroep</i> , formerly linked to the Catholic pillar | Netherlands                      | 15.8.17 | Hilversum              |
| 42 | Editor-in-Chief, RTL                                        | Commercial television station in the Netherlands                                                    | Netherlands                      | 15.5.17 | Hilversum              |
| 43 | Deputy Editor-in-Chief, NRC                                 | Daily newspaper published by <i>Mediahuis</i>                                                       | Netherlands                      | 16.8.17 | Amsterdam              |
| 44 | Director of Legal Affairs, RTBF                             | Francophone public service broadcaster                                                              | Wallonia                         | 28.9.17 | Brussels               |
| 45 | Political Journalist, <i>Algemeen Dagblad</i>               | Daily tabloid newspaper, published by <i>Persgroep</i>                                              | Netherlands                      | 29.9.17 | Rotterdam              |
| 46 | Europe Correspondent for <i>de Volkskrant</i>               | Centre-left daily newspaper, published by <i>Persgroep</i> , formerly linked to the Catholic pillar | Netherlands; Wallonia & Flanders | 29.9.17 | Breda                  |
